# Supplementary material for: Redox-Responsive Hydrogels for Tunable and “On-Demand” Release of Biomacromolecules
Source: PubMed Central journal article supplement (PMC9121344; doi:10.1021/acs.bioconjchem.2c00094), 2022-04-21
Supplement: bc2c00094_si_001.pdf [file bc2c00094_si_001.pdf]

## Supporting Information

### Redox-Responsive Hydrogels for Tunable and ‘On-Demand’

#### Release of Biomacromolecules

Ruveyda Kilic Boz,<sup>a, †</sup> Duygu Aydin,<sup>a, †</sup> Salli Kocak,<sup>a</sup> Bianka Golba,<sup>a</sup>

Rana Sanyal,<sup>a,b</sup> and Amitav Sanyal <sup>\*,a,b</sup>

<sup>a</sup> *Department of Chemistry, Bogazici University, Istanbul 34342, Turkey*

<sup>b</sup> *Center for Life Sciences and Technologies, Bogazici University, Istanbul, Turkey*

† These authors contributed equally to this study.

\* Corresponding authors: Email address: [amitav.sanyal@boun.edu.tr](mailto:amitav.sanyal@boun.edu.tr).

## LIST OF FIGURES

|                                                                                                                                                                                                                                                       |   |
|-------------------------------------------------------------------------------------------------------------------------------------------------------------------------------------------------------------------------------------------------------|---|
| <b>Figure S1.</b> <sup>1</sup> HNMR spectrum of P2K-COOH in CDCl <sub>3</sub> .....                                                                                                                                                                   | 3 |
| <b>Figure S2.</b> <sup>1</sup> HNMR spectrum of P8K-COOH in CDCl <sub>3</sub> .....                                                                                                                                                                   | 3 |
| <b>Figure S3.</b> <sup>1</sup> HNMR spectrum of P2K-PDS in CDCl <sub>3</sub> . ....                                                                                                                                                                   | 4 |
| <b>Figure S4.</b> <sup>1</sup> HNMR spectrum of P8K-PDS in CDCl <sub>3</sub> . ....                                                                                                                                                                   | 4 |
| <b>Figure S5.</b> <sup>13</sup> CNMR spectrum of P2K-PDS in CDCl <sub>3</sub> . ....                                                                                                                                                                  | 5 |
| <b>Figure S6.</b> <sup>13</sup> CNMR spectrum of P8K-PDS in CDCl <sub>3</sub> . ....                                                                                                                                                                  | 5 |
| <b>Figure S7.</b> GPC chromatograms of linear PEG-OH (left) and PDS-functionalized PEG (right). ....                                                                                                                                                  | 6 |
| <b>Figure S8.</b> FTIR spectra of P2K-OH (A), P2K-PDS (B), P8K-OH (C), P8K-PDS (D). ....                                                                                                                                                              | 6 |
| <b>Figure S9.</b> Strain dependent deformation of hydrogel (P8K).....                                                                                                                                                                                 | 7 |
| <b>Figure S10.</b> Rheological self-healing test for P8K hydrogel (40 mg) soaked in ethyl-maleimide containing PBS solution (0.6 mg/mL) showing storage modulus (G') and loss modulus (G'') at alternating strains of 1 and 600% (three cycles). .... | 7 |
| <b>Figure S11.</b> Visual degradation of dye-conjugated hydrogel (P8K) in GSH (5 mM) and PBS at 37 °C.....                                                                                                                                            | 7 |

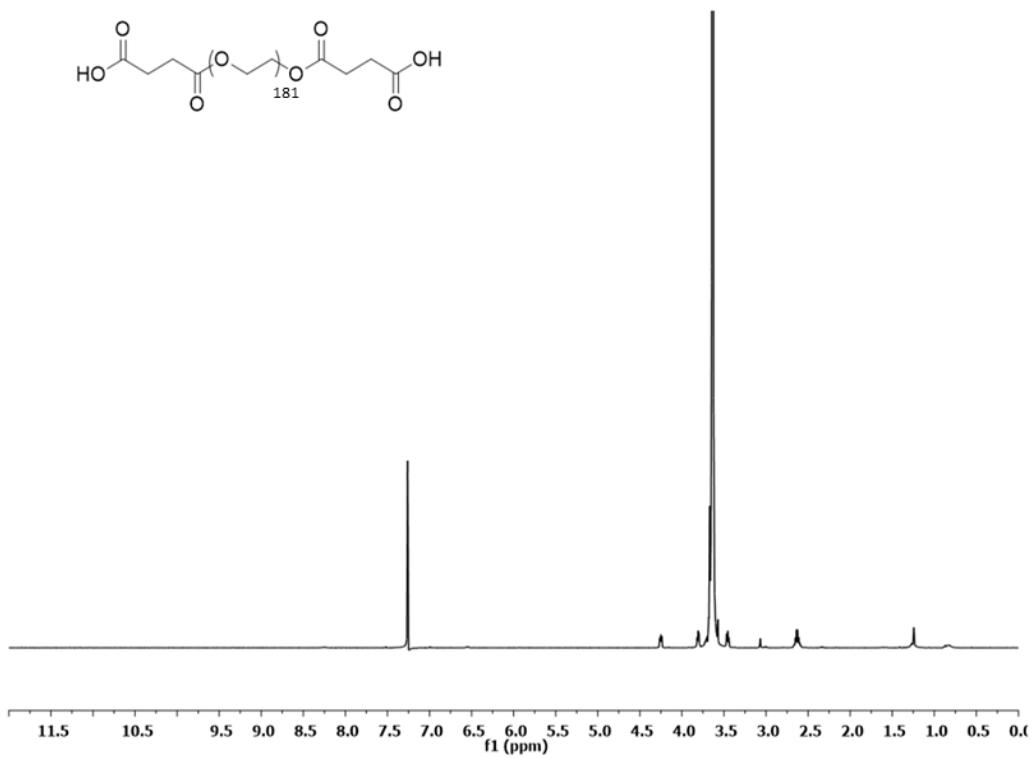

**Figure S1.**  $^1\text{H}$ NMR spectrum of P2K-COOH in  $\text{CDCl}_3$ .

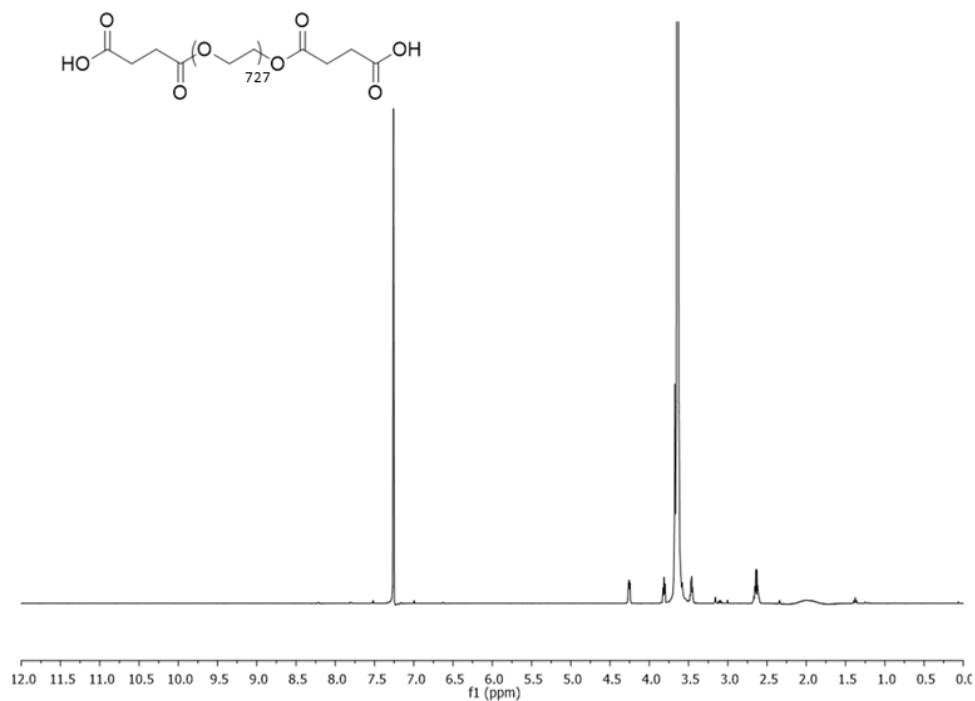

**Figure S2.**  $^1\text{H}$ NMR spectrum of P8K-COOH in  $\text{CDCl}_3$ .

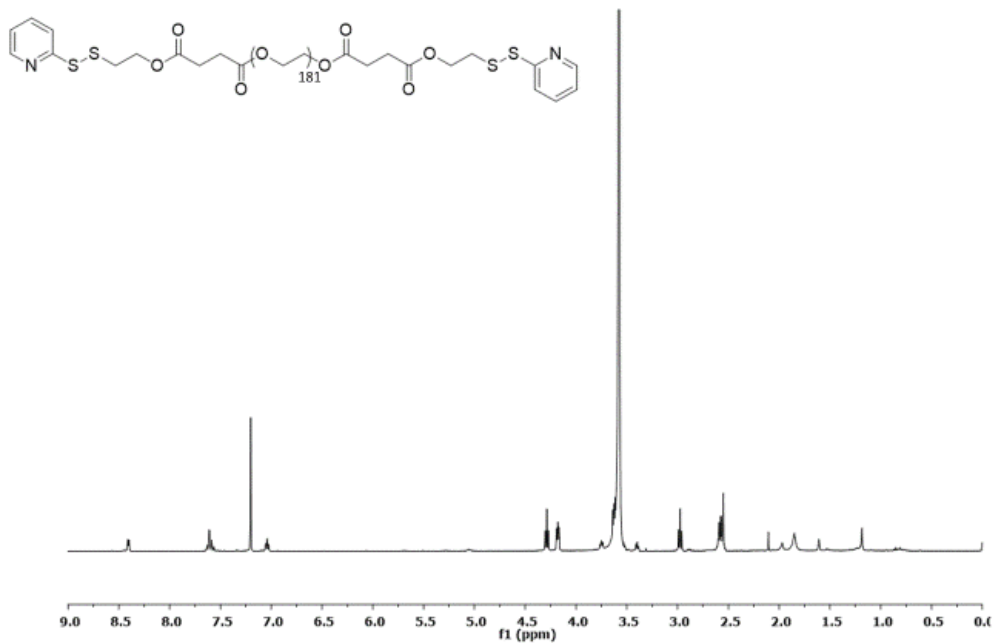

**Figure S3.**  $^1\text{H}$ NMR spectrum of P2K-PDS in  $\text{CDCl}_3$ .

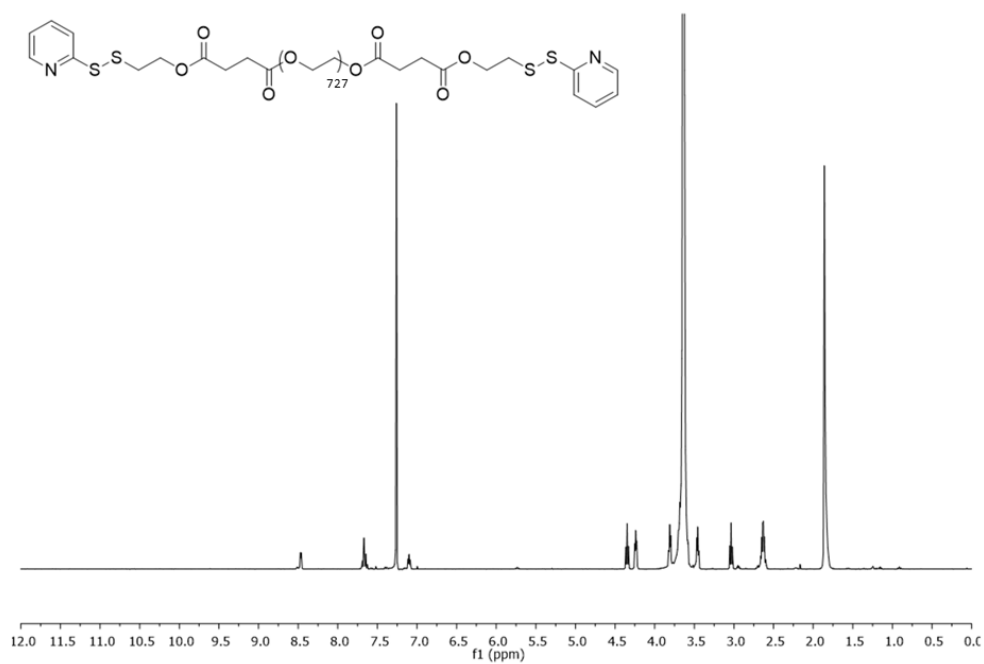

**Figure S4.**  $^1\text{H}$ NMR spectrum of P8K-PDS in  $\text{CDCl}_3$ .

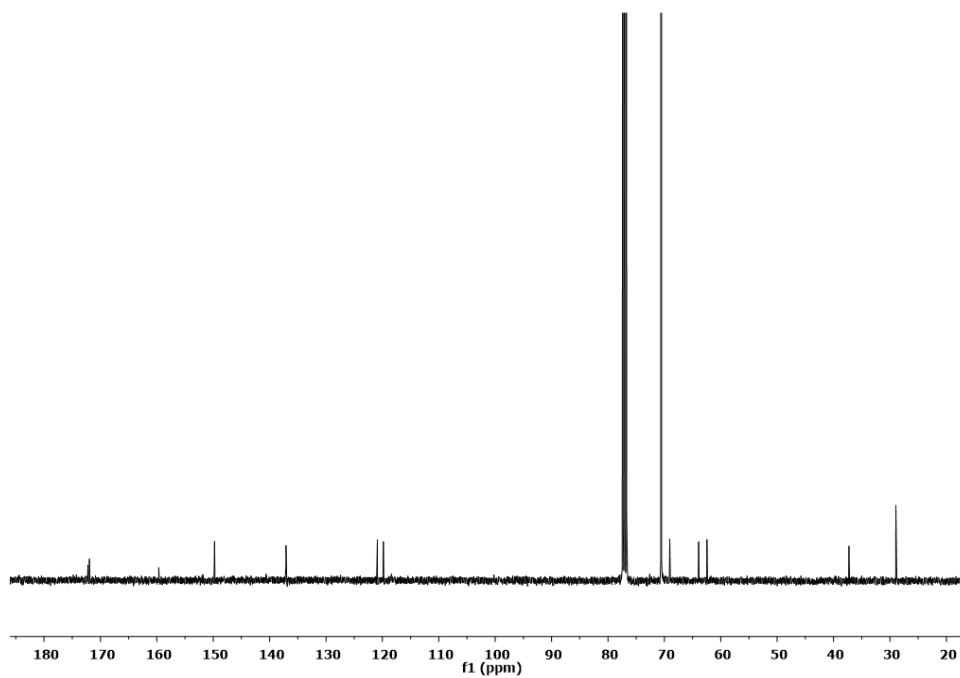

**Figure S5.**  $^{13}\text{C}$ NMR spectrum of P2K-PDS in  $\text{CDCl}_3$ .

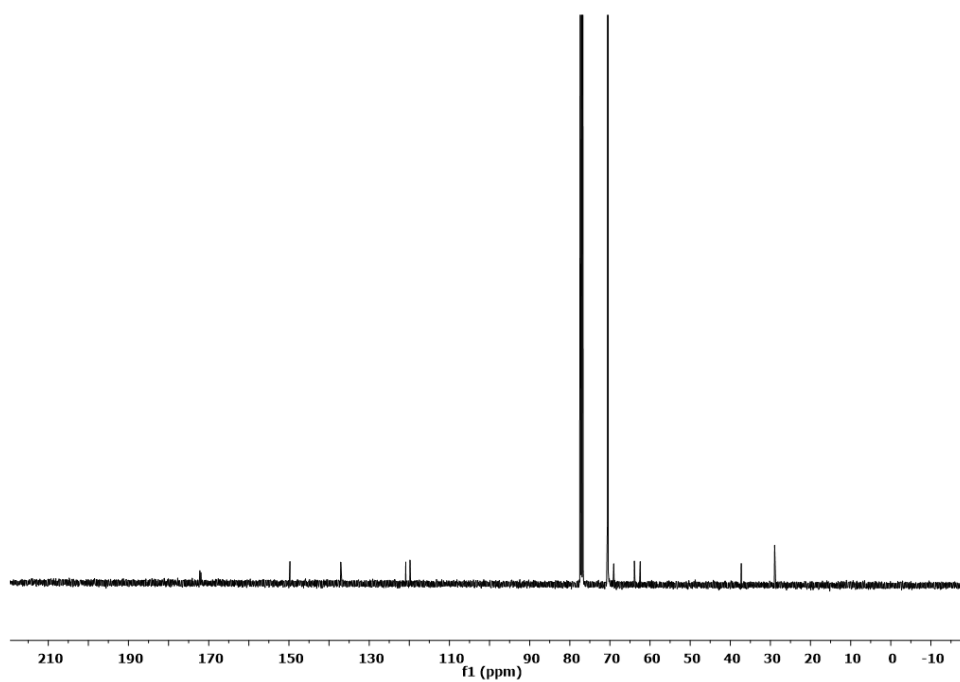

**Figure S6.**  $^{13}\text{C}$ NMR spectrum of P8K-PDS in  $\text{CDCl}_3$ .

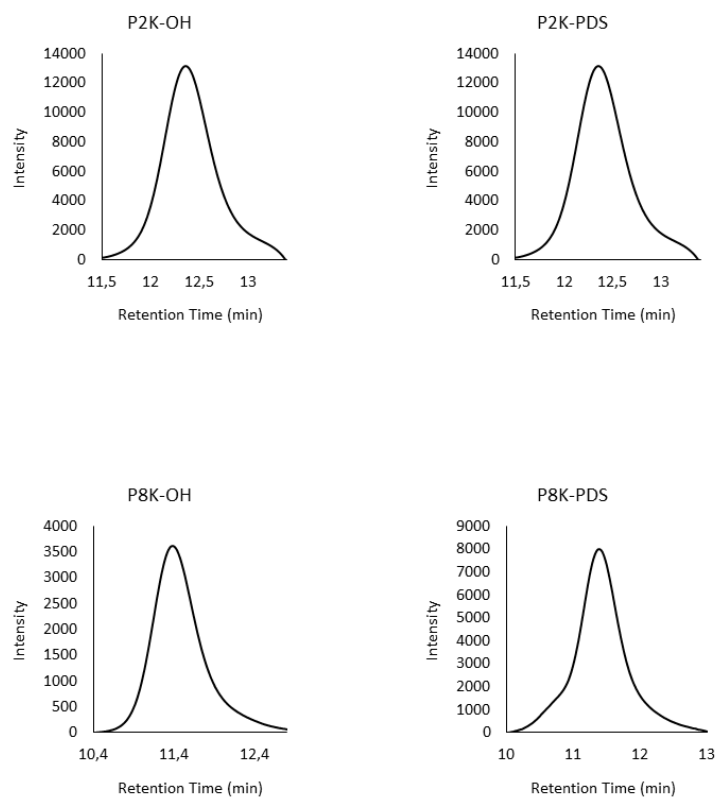

**Figure S7.** GPC chromatograms of linear PEG-OH (left) and PDS-functionalized PEG (right).

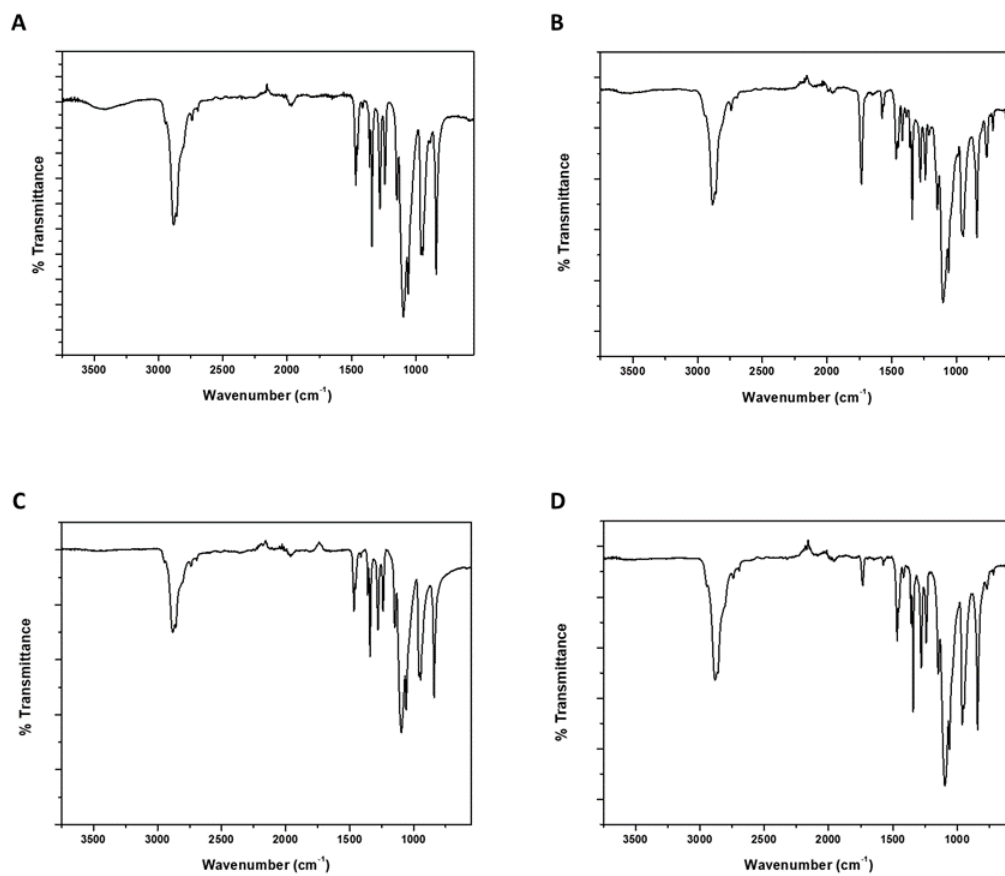

**Figure S8.** FTIR spectra of P2K-OH (A), P2K-PDS (B), P8K-OH (C), P8K-PDS (D).

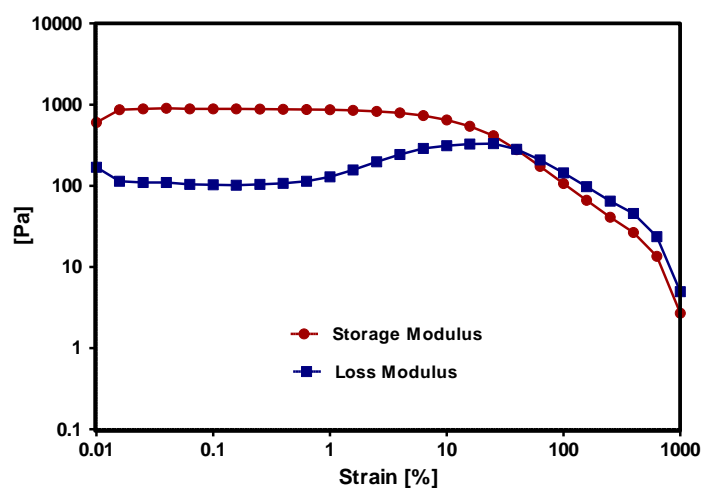

**Figure S9.** Strain dependent deformation of hydrogel (P8K).

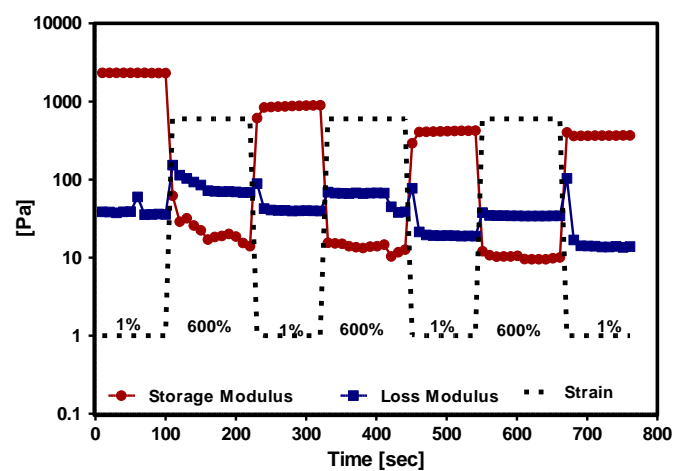

**Figure S10.** Rheological self-healing test for P8K hydrogel (40 mg) soaked in ethyl-maleimide containing PBS solution (0.6 mg/mL) showing storage modulus ( $G'$ ) and loss modulus ( $G''$ ) at alternating strains of 1 and 600% (three cycles).

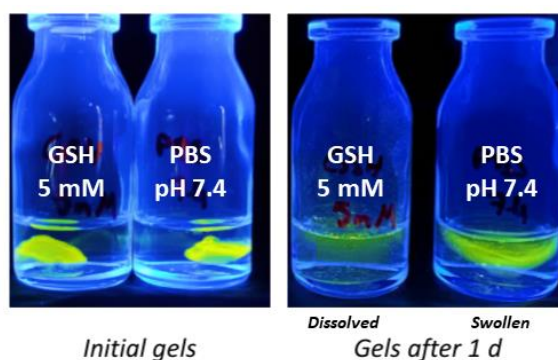

**Figure S11.** Visual degradation of dye-conjugated hydrogel (P8K) in GSH (5 mM) and PBS at 37 °C.
